# Supplementary material for: Unveiling the Mysteries of Dyslexia—Lessons Learned from the Prospective Jyväskylä Longitudinal Study of Dyslexia
Source: MDPI journal article supplement (doi:10.3390/brainsci11040427), 2021-03-27
Supplement: s1 [file s1]

**Jyväskylä Longitudinal Study of Dyslexia, JLD: Measures**

| <b>Age</b>                   | <b>Content/measure</b>                                                                                                                                                                                                                      | <b>Data</b>                                                                               |
|------------------------------|---------------------------------------------------------------------------------------------------------------------------------------------------------------------------------------------------------------------------------------------|-------------------------------------------------------------------------------------------|
| <b>1-5 days<br/>Hospital</b> | <b>Brain responses to speech/nonspeech stimuli</b>                                                                                                                                                                                          | <b>ERP + Heart rate</b>                                                                   |
| <b>Age</b>                   | <b>Content/measure</b>                                                                                                                                                                                                                      | <b>Data</b>                                                                               |
| <b>6 months</b>              | <b>Brain responses to speech/nonspeech stimuli</b>                                                                                                                                                                                          | <b>ERP + Heart rate</b>                                                                   |
|                              | <b>Categorical perception of speech stimuli</b>                                                                                                                                                                                             | <b>Head turn</b>                                                                          |
|                              | <b>Parent-child interaction &amp; motor imitation</b>                                                                                                                                                                                       | <b>Videotape</b>                                                                          |
|                              | <b>Visual recognition memory</b>                                                                                                                                                                                                            | <b>Test</b>                                                                               |
| <b>Age</b>                   | <b>Content/measure</b>                                                                                                                                                                                                                      | <b>Data</b>                                                                               |
| <b>0 –12 months</b>          | <b>Developmental milestones in</b><br>1) vocalization,<br>2) speech comprehension,<br>3) motor & fine motor development                                                                                                                     | <b>Parent diary: checklists</b>                                                           |
| <b>1, 6 &amp; 12 mo</b>      | <b>Infant Behavior Questionnaire: Temperament</b>                                                                                                                                                                                           | <b>Parental report</b>                                                                    |
| <b>4 –24 months</b>          | <b>Vocalization and speech in interactional situations at home (subsample, n = 60; monthly videotapings)</b>                                                                                                                                | <b>Video-tapings by parents at home</b>                                                   |
| <b>Age</b>                   | <b>Content/measure</b>                                                                                                                                                                                                                      | <b>Data</b>                                                                               |
| <b>12 months</b>             | <b>MacArthur Communicative Development Inventory (MCDI): Vocabulary comprehension and production</b>                                                                                                                                        | <b>Parental report</b>                                                                    |
| <b>Age</b>                   | <b>Content/measure</b>                                                                                                                                                                                                                      | <b>Data</b>                                                                               |
| <b>14 months</b>             | <b>Interaction: Parent-child free play</b><br><b>Joint book reading</b>                                                                                                                                                                     | <b>Videotape</b>                                                                          |
| <b>Lab</b>                   | <b>Structured play</b><br><b>Observation of wariness in a novel situation: Temperament</b><br><b>MacArthur Communicative Development Inventory</b>                                                                                          | <b>Videotape + DAT recording</b><br><b>Videotape</b><br><b>Parental report</b>            |
| <b>Age</b>                   | <b>Content/measure</b>                                                                                                                                                                                                                      | <b>Data</b>                                                                               |
| <b>18 months</b>             | <b>Reynell Developmental Language Scales: Verbal comprehension &amp; expressive language</b>                                                                                                                                                | <b>Test</b>                                                                               |
| <b>Lab</b>                   | <b>Structured play</b><br><b>Word-imitation task</b><br><b>MacArthur Communicative Development Inventory (MCDI): Vocabulary production, use of suffixes, Maximum Sentence Length</b>                                                        | <b>Videotape</b><br><b>Videotape + DAT recording</b><br><b>Parental report</b>            |
| <b>Age</b>                   | <b>Content/measure</b>                                                                                                                                                                                                                      | <b>Data</b>                                                                               |
| <b>24 months</b>             | <b>Bayley Scales of Infant Development II: MDI, PDI, Language composite, Expressive language, Receptive language</b>                                                                                                                        | <b>Videotape + DAT recording</b>                                                          |
| <b>Lab</b>                   | <b>Interaction: Parent-child free play</b><br><b>Joint book reading</b><br><b>MacArthur Communicative Development Inventory</b><br><b>Questionnaire: Shared reading and joint activities</b>                                                | <b>Videotape + DAT recording</b><br><b>Parental report</b><br><b>Parental report</b>      |
| <b>Age</b>                   | <b>Content/measure</b>                                                                                                                                                                                                                      | <b>Data</b>                                                                               |
| <b>2.5 years</b>             | <b>Reynell Developmental Language Scales</b>                                                                                                                                                                                                | <b>Test</b>                                                                               |
| <b>Home</b>                  | <b>Picture naming task: phonological accuracy of speech production, rhyme repetition</b><br><b>Comprehension of inflectional forms</b><br><b>Speech elicited in structured play</b><br><b>MacArthur Communicative Development Inventory</b> | <b>Videotape + audiotape</b><br><b>Test</b><br><b>Videotape</b><br><b>Parental report</b> |

| Age      | Content/measure                                                                               | Data                   |
|----------|-----------------------------------------------------------------------------------------------|------------------------|
| 3 years  | Bayley Scales of Infant Development II<br>Controls: n = 60; At risk: n = 33 (severe dyslexia) | Test                   |
| Subgroup | Boston Naming Test                                                                            | Test                   |
| Lab      | Parent-child problem solving<br>Parent-child book reading                                     | Videotape<br>Videotape |

  

| Age       | Content/measure                                                                                                                                                                                                          | Data      |
|-----------|--------------------------------------------------------------------------------------------------------------------------------------------------------------------------------------------------------------------------|-----------|
| 3.5 years | <i>Language clubs</i> . October 1996 $\exists$ May 1999. 10 groups, n = 66<br>Group activity for children and parents (involving individual child assessments). Groups of 6-8 children met once a week for 7 to 9 times. | Videotape |

  

| Age       | Content/measure                                                                                                                                                                                                                                                                                                                                                                                                     | Data                                                           |
|-----------|---------------------------------------------------------------------------------------------------------------------------------------------------------------------------------------------------------------------------------------------------------------------------------------------------------------------------------------------------------------------------------------------------------------------|----------------------------------------------------------------|
| 3.5 years | <u>Phonological awareness</u>                                                                                                                                                                                                                                                                                                                                                                                       | Computer-aided assessment with touch screen (AHeps-Kups Land@) |
| Lab       | 1) Word-level segment identification                                                                                                                                                                                                                                                                                                                                                                                |                                                                |
| 2 visits  | 2) Syllable-level segment identification                                                                                                                                                                                                                                                                                                                                                                            |                                                                |
|           | 3) Synthesis of phonological units                                                                                                                                                                                                                                                                                                                                                                                  |                                                                |
|           | 4) Continuation of phonological units                                                                                                                                                                                                                                                                                                                                                                               | Computer-aided assessment with touch screen (AHeps-Kups Land@) |
|           | <u>Phonological processing</u>                                                                                                                                                                                                                                                                                                                                                                                      |                                                                |
|           | 1) Perception of time-compressed words                                                                                                                                                                                                                                                                                                                                                                              |                                                                |
|           | 2) RAN: Rapid naming of individually presented pictures                                                                                                                                                                                                                                                                                                                                                             | Test                                                           |
|           | 3) Repetition of pseudowords                                                                                                                                                                                                                                                                                                                                                                                        |                                                                |
|           | NEPSY - A Developmental Neuropsychological Assessment<br>Korkman, M., Kirk, U., & Kemp, S. (1998)                                                                                                                                                                                                                                                                                                                   | Test                                                           |
|           | <i>Attention/Executive</i> : Visual attention. <i>Language</i> : Naming of body parts; Phonological processing A; Comprehension of instructions; Repetition of nonsense words. <i>Sensorimotor</i> : Visuomotor precision; Finger discrimination. <i>Visuospatial</i> : Design copying; Block construction; Picture recognition. <i>Memory</i> : Immediate memory for faces; Narrative memory; Sentence repetition. |                                                                |
|           | <u>Orthographic skills</u>                                                                                                                                                                                                                                                                                                                                                                                          |                                                                |
|           | 1) Identification of letters                                                                                                                                                                                                                                                                                                                                                                                        |                                                                |
|           | 2) Naming letters                                                                                                                                                                                                                                                                                                                                                                                                   |                                                                |
|           | 3) Logographic identification of words                                                                                                                                                                                                                                                                                                                                                                              |                                                                |
|           | 4) Visual matching                                                                                                                                                                                                                                                                                                                                                                                                  |                                                                |
|           | 5) Identification and writing of one's own name                                                                                                                                                                                                                                                                                                                                                                     |                                                                |
|           | <u>Other language measures</u> :                                                                                                                                                                                                                                                                                                                                                                                    |                                                                |
|           | 1) Boston Naming Test                                                                                                                                                                                                                                                                                                                                                                                               |                                                                |
|           | 2) Peabody Picture Vocabulary Test (adaptively)                                                                                                                                                                                                                                                                                                                                                                     | Test                                                           |
|           | 3) Morphology Test                                                                                                                                                                                                                                                                                                                                                                                                  |                                                                |
|           | 4) Digit Span                                                                                                                                                                                                                                                                                                                                                                                                       | Videotape                                                      |
|           | 5) Rapid naming (RAN): Objects                                                                                                                                                                                                                                                                                                                                                                                      |                                                                |
|           | Parent-child book reading                                                                                                                                                                                                                                                                                                                                                                                           | Test + videotape                                               |
|           | Movement-ABC Test                                                                                                                                                                                                                                                                                                                                                                                                   |                                                                |
|           | Automatisation: dual task (balance & naming)                                                                                                                                                                                                                                                                                                                                                                        |                                                                |

| Age           | Content/measure                                                                                                                                                                                                                                                                                                                                                                                                                       | Data                                                           |
|---------------|---------------------------------------------------------------------------------------------------------------------------------------------------------------------------------------------------------------------------------------------------------------------------------------------------------------------------------------------------------------------------------------------------------------------------------------|----------------------------------------------------------------|
| 4 years       | <b>Parent questionnaires</b>                                                                                                                                                                                                                                                                                                                                                                                                          | Parental report                                                |
| Parent report | 1) Shared reading & joint activities with the child<br>2) Day care & peer relations<br>3) Parenting attitudes, mood, stress, employment<br>4) <i>Behavior Assessment System for Children (BASC)</i> Reynolds, C. R., & Kamphaus, R. W. (1992). Adaptability, Social skills, Attention problems, Hyperactivity, Aggression, Anxiety, Depression, Somatization, Atypicality, Withdrawal<br>5) Child Behavior Questionnaire: Temperament |                                                                |
| Age           | Content/measure                                                                                                                                                                                                                                                                                                                                                                                                                       | Data                                                           |
| 4.5 years     | <b>Phonological awareness</b>                                                                                                                                                                                                                                                                                                                                                                                                         | Computer-aided assessment with touch screen (AHeps-Kups Land@) |
| Lab           | 1) Syllable/phoneme-level segment identification (16 items)<br>2) Synthesis of phonological units (12 items; e.g., <i>m-u-n-a</i> )<br>3) Continuation of phonological units (12 items; e.g., <i>ki-</i> )<br>4) Say just a little bit (8 items; e.g., <i>puhelin</i> )<br>5) Odd one out: Rhyme (8 items; e.g., <i>raha-kynä-saha</i> )<br>6) Odd one out: Alliteration (8 items; e.g., <i>peikko-peitto-nappi</i> )                 |                                                                |
|               | <b>Phonological processing</b>                                                                                                                                                                                                                                                                                                                                                                                                        | Computer-aided assessment with touch screen (AHeps-Kups Land@) |
|               | 1) Perception of time-compressed words (18 items)<br>2) Rapid naming of individually presented pictures<br>3) Repetition of pseudowords (18; e.g., <i>paohki, jomettö</i> )<br>4) Perception of non-speech sounds & sound patterns                                                                                                                                                                                                    |                                                                |
|               | <b>Other phonological awareness tasks:</b>                                                                                                                                                                                                                                                                                                                                                                                            | Test                                                           |
|               | 1) Initial phoneme recognition (9 items; <i>R E tuoli, raha, keinu, juna</i> )<br>2) Initial phoneme production (8 items; e.g., <i>siili</i> )<br>3) Rhyme production (10; <i>Kissa istui puussa, iso kala C</i> )<br>4) Word segmentation (14 items; e.g., <i>pain-sa, s-u-o</i> )                                                                                                                                                   |                                                                |
|               | <b>Morphology Test</b>                                                                                                                                                                                                                                                                                                                                                                                                                | Test                                                           |
|               | <b>Orthographic skills</b>                                                                                                                                                                                                                                                                                                                                                                                                            | Test                                                           |
|               | 1) Identification of letters (8 items)<br>2) Logographic identification of words (6 items; e.g., <i>Muumi</i> )<br>3) Visual matching (10 items; e.g., <i>RU, π, nas</i> )<br>4) Identification of one's own name                                                                                                                                                                                                                     |                                                                |
|               | <b>Reading &amp; Spelling</b>                                                                                                                                                                                                                                                                                                                                                                                                         | Test                                                           |
|               | 1) Naming letters (23 letters)<br>2) Reading words/nonwords (4 + 4 items; <i>isä, suu, talo, rui / pallo, kaunis, siellä, olus</i> )<br>3) Spelling words/nonwords (5 + 4 items: <i>äiti, auto, tie, nalle, usa / koira, sakset, temppu, ryhe</i> )<br>4) Writing one's own name                                                                                                                                                      |                                                                |
|               | <b>Frog Story (child's narrative based on a series of pictures)</b>                                                                                                                                                                                                                                                                                                                                                                   | Test & videotape                                               |
|               | <b>Print exposure (e.g., letters &amp; phonemes)</b>                                                                                                                                                                                                                                                                                                                                                                                  | Parental report                                                |

| Age     | Content/measure                                                                                                                                                            | Data            |
|---------|----------------------------------------------------------------------------------------------------------------------------------------------------------------------------|-----------------|
| 5 years | Peabody Picture Vocabulary Test                                                                                                                                            | Test            |
|         | Morphology Test                                                                                                                                                            | Test            |
|         | <u>Memory</u>                                                                                                                                                              |                 |
|         | 1) Digit Span,                                                                                                                                                             | Computer test   |
|         | 2) Span for syllables                                                                                                                                                      | Computer test   |
|         | 3) Memory for spatial sequences: Corsi blocks                                                                                                                              | Test            |
|         | <u>Accuracy of representations:</u>                                                                                                                                        |                 |
|         | Perception of phonological variants of words and non-words                                                                                                                 | Computer test   |
|         | <u>Orthographic skills</u>                                                                                                                                                 |                 |
|         | 1) Identification of letters (8 items)                                                                                                                                     | Test            |
|         | 2) Logographic identification of words (6 items; e.g., <i>Muumi</i> )                                                                                                      |                 |
|         | 3) Visual matching (10 items; e.g., <i>RU</i> , <i>π</i> , <i>nas</i> )                                                                                                    |                 |
|         | 4) Identification of one's own name                                                                                                                                        |                 |
|         | <u>Reading &amp; spelling</u>                                                                                                                                              |                 |
|         | 1) Naming letters (23 letters)                                                                                                                                             | Test            |
|         | 2) Reading words/nonwords (4 + 4 items; <i>isä</i> , <i>suu</i> , <i>talo</i> , <i>rui</i> / <i>pallo</i> , <i>kaunis</i> , <i>siellä</i> , <i>olus</i> )                  |                 |
|         | 3) Spelling words/nonwords (5 + 4 items: <i>äiti</i> , <i>auto</i> , <i>tie</i> , <i>nalle</i> , <i>usa</i> / <i>koira</i> , <i>sakset</i> , <i>temppe</i> , <i>ryhe</i> ) |                 |
|         | WPPSI-R (Wechsler Preschool and Primary Scale of Intelligence-R; Wechsler, 1989): 3 + 3 short form                                                                         | Test            |
|         | 1) Vocabulary                                                                                                                                                              |                 |
|         | 2) Arithmetic                                                                                                                                                              |                 |
|         | 3) Comprehension                                                                                                                                                           |                 |
|         | 4) Block Design                                                                                                                                                            |                 |
|         | 5) Object Assembly                                                                                                                                                         |                 |
|         | 6) Picture Completion                                                                                                                                                      |                 |
|         | <u>Parent-child interaction:</u> Constructing a story sequence using series of pictures with temporal order                                                                | Videotape       |
|         | <u>Questionnaires:</u>                                                                                                                                                     |                 |
|         | 1) Shared reading & joint activities with the child                                                                                                                        | Parental report |
|         | 2) Day care                                                                                                                                                                |                 |
|         | 3) Behavior Assessment System for Children (BASC)                                                                                                                          |                 |

| Age                     | Content/measure                                                                                                                                                                                                                                                                                                                                                                                                                                                                                                                                                                                                                                                                                                                                                                                                                                                                                                                                                                                                                                                                                                                                                                                                                                                                                                                                                                                                                                                                                                                                                                                                                                                                                             | Data                                                                                                                                |
|-------------------------|-------------------------------------------------------------------------------------------------------------------------------------------------------------------------------------------------------------------------------------------------------------------------------------------------------------------------------------------------------------------------------------------------------------------------------------------------------------------------------------------------------------------------------------------------------------------------------------------------------------------------------------------------------------------------------------------------------------------------------------------------------------------------------------------------------------------------------------------------------------------------------------------------------------------------------------------------------------------------------------------------------------------------------------------------------------------------------------------------------------------------------------------------------------------------------------------------------------------------------------------------------------------------------------------------------------------------------------------------------------------------------------------------------------------------------------------------------------------------------------------------------------------------------------------------------------------------------------------------------------------------------------------------------------------------------------------------------------|-------------------------------------------------------------------------------------------------------------------------------------|
| 5.5 years<br>(2 visits) | <p>NEPSY – Developmental Neuropsychological Assessment<br/>Korkman, M., Kirk, U., &amp; Kemp, S. (1998)</p> <p><i>Attention/Executive:</i> Visual attention; Tower; Auditory attention; Knock and tap. <i>Language:</i> Phonological processing; Comprehension of instructions; Repetition of nonsense words; Oromotor sequences; Verbal fluency. <i>Visuospatial:</i> Design copying. <i>Sensorimotor:</i> Visuomotor precision. <i>Memory:</i> Narrative memory; Sentence repetition; Memory for names; Immediate &amp; delayed memory for faces.</p> <p>Boston Naming Test</p> <p><u>Phonological awareness</u></p> <ol style="list-style-type: none"> <li>1) Initial phoneme recognition</li> <li>2) Initial phoneme production</li> <li>3) Rhyme production</li> <li>4) Word segmentation</li> <li>5) Syllable/phoneme-level segment identification</li> <li>6) Synthesis of phonological units</li> </ol> <p><u>Association learning</u></p> <ol style="list-style-type: none"> <li>1) Audio-visual association</li> <li>2) Audio-phonemic association</li> <li>3) Visual-visual association</li> <li>4) Memory association</li> </ol> <p>RAN: Objects &amp; colors</p> <p><u>Orthographic skills</u></p> <ol style="list-style-type: none"> <li>1) Identification of letters</li> <li>2) Logographic identification of words</li> <li>3) Visual matching</li> </ol> <p><u>Reading &amp; Spelling</u></p> <ol style="list-style-type: none"> <li>1) Naming letters</li> <li>2) Letter to phoneme production</li> <li>3) Reading words/nonwords</li> <li>4) Spelling words/nonwords</li> <li>5) Synthesis and segmentation of nonsense syllables</li> <li>6) Identification of word meaning</li> </ol> | <p>Test</p> <p>Test</p> <p>Test</p> <p>Computer test<br/>Computer test</p> <p>Computer test</p> <p>Test</p> <p>Test</p> <p>Test</p> |

| Age     | Content/measure                                                                                                                                                                                                                                                                                                                                                                                                                                                                                    |                                                         |
|---------|----------------------------------------------------------------------------------------------------------------------------------------------------------------------------------------------------------------------------------------------------------------------------------------------------------------------------------------------------------------------------------------------------------------------------------------------------------------------------------------------------|---------------------------------------------------------|
| 6 years | <p><u>Parent questionnaires</u></p> <ol style="list-style-type: none"> <li>1) Shared reading &amp; joint activities with the child</li> <li>2) Day care</li> <li>3) Social skills, social network</li> <li>4) Behavior Assessment System for Children (BASC)</li> <li>5) Parenting attitudes, mood, strategies, employment</li> </ol> <p><u>Preschool teacher questionnaire</u></p> <ol style="list-style-type: none"> <li>1) Motivation</li> <li>2) Achievement</li> <li>3) Strategies</li> </ol> | <p>Parental report</p> <p>Preschool teacher ratings</p> |

| Age                     | Content/measure                                                     | Data                 |
|-------------------------|---------------------------------------------------------------------|----------------------|
| 6.5 years<br>(2 visits) | <b><u>Phonological awareness</u></b>                                |                      |
|                         | 1) Initial phoneme recognition                                      | Test                 |
|                         | 2) Initial phoneme production and deletion (Poskiparta ym.)         |                      |
|                         | 3) Syllable deletion (Poskiparta ym.)                               |                      |
|                         | 4) Word segmentation                                                |                      |
|                         | 5) Syllable/phoneme-level segment identification                    | Computer test        |
|                         | 6) Continuation of phonological unit                                | Computer test        |
|                         | <b>Non-word repetition</b>                                          | Computer test        |
|                         | <b><u>Association learning</u></b>                                  |                      |
|                         | 1) Audio-visual association                                         | Computer test        |
|                         | 2) Audio-phonemic association                                       |                      |
|                         | 3) Visual-visual association                                        |                      |
|                         | 4) Memory association                                               |                      |
|                         | <b>Digit span</b>                                                   | Test                 |
|                         | <b>Rapid naming (RAN): Objects, colors, numbers, letters</b>        | Test                 |
|                         | <b><u>Reading &amp; Spelling</u></b>                                |                      |
|                         | 1) Naming letters                                                   | Test                 |
|                         | 2) Reading words/nonwords                                           |                      |
|                         | 3) Spelling words/nonwords                                          |                      |
|                         | 4) Synthesis and segmentation of nonsense syllables                 |                      |
|                         | 5) Identification of word meaning                                   |                      |
|                         | 6) Text reading                                                     |                      |
|                         | <b>Movement ABC Test</b>                                            | Test                 |
|                         | <b>Child interview: Strategies &amp; attributions</b>               | Self-evaluation      |
|                         | <b>Ratings: Child=s strategies</b>                                  | Rating by the tester |
|                         | <b>Auditory discrimination: ERP - speech &amp; non-speech</b>       | Test                 |
|                         | <b>Auditory behavioral categorisation - speech &amp; non-speech</b> | Test                 |

| Age                               | Content/measure                                                                                                                                                                        | Data             |
|-----------------------------------|----------------------------------------------------------------------------------------------------------------------------------------------------------------------------------------|------------------|
| 6.5 years    ∃<br>Case<br>studies | <b><u>Interventions</u></b>                                                                                                                                                            |                  |
|                                   | 1) Phonological skills                                                                                                                                                                 | Tests, videotape |
|                                   | 2) Naming                                                                                                                                                                              |                  |
|                                   | 3) Family School – group intervention for children with overactivity and their parents.<br>Group 1, Spring 2001: 5 children + 5 parents,<br>Group 2, Fall 2001: 4 children + 6 parents |                  |
| Age                               | Content/measure                                                                                                                                                                        | Data             |
| 7.0 years                         | <b><u>Questionnaires</u></b>                                                                                                                                                           |                  |

| GRADE 1: August, Individual assessment                                                                                                                                                                                                                                                                                                                                                                                                                                                                                                                                                         | Data                                                      |
|------------------------------------------------------------------------------------------------------------------------------------------------------------------------------------------------------------------------------------------------------------------------------------------------------------------------------------------------------------------------------------------------------------------------------------------------------------------------------------------------------------------------------------------------------------------------------------------------|-----------------------------------------------------------|
| <u>Phonological awareness</u><br>1) Phoneme blending (Poskiparta ym.; <i>p-u-u</i> )<br>2) Syllable deletion (Poskiparta ym.; <i>paluu</i> ∃ <i>luu</i> )<br>3) Initial phoneme production & deletion (Poskiparta ym.; <i>asuu</i> ∃ <i>suu</i> )<br>4) Phonological Same Different Matching Task: Syllable, rime & phoneme level ( <i>poika</i> - <i>sulka</i> ; <i>varvas</i> - <i>karhu</i> ; <i>hattu</i> - <i>helmi</i> )<br>5) Phonological Common Unit Task: Syllable, rime & phoneme level ( <i>lehmä</i> - <i>lehti</i> ; <i>leija</i> - <i>neiti</i> ; <i>noita</i> - <i>kukka</i> ) | Tests<br><br><br>Cognitive Workshop<br>Cognitive Workshop |
| <u>Reading</u><br>1) Letter naming (29 letters)<br>2) Content words (9 words)<br>3) Function words (9 words)<br>4) Syllables (9; e.g., <i>eh</i> , <i>vis</i> , <i>li</i> , <i>nä</i> )<br>5) Bi-syllabic nonwords (9; e.g., <i>värö</i> , <i>ame</i> , <i>hopa</i> )<br>6) Complex nonwords (9; e.g., <i>uivot</i> , <i>reistoa</i> , <i>sohdi</i> )<br>7) Word recognition (ALLU, TL2 A; 5 min; matching word to pictures)                                                                                                                                                                   | Cognitive Workshop<br><br><br><br><br>Test                |
| <u>Spelling</u><br>1) Letters (29 letters)<br>2) Content words (4 words; <i>koti</i> , <i>kirja</i> , <i>joulu</i> , <i>isä</i> )<br>3) Syllables (9; e.g., <i>is</i> , <i>vor</i> , <i>ke</i> )<br>4) Bi-syllabic nonwords (9; e.g., <i>ysö</i> , <i>vami</i> , <i>evot</i> )<br>5) Complex nonwords (9; e.g., <i>hoipi</i> , <i>onkula</i> )                                                                                                                                                                                                                                                 | Test                                                      |
| <u>Mathematics</u><br>1) Numbers (6 tasks)<br>4) Comparison of auditorily presented numbers<br>5) Identification of auditorily presented numbers<br>6) Counting (Adots@)                                                                                                                                                                                                                                                                                                                                                                                                                       | Test                                                      |
| Rapid naming                                                                                                                                                                                                                                                                                                                                                                                                                                                                                                                                                                                   |                                                           |
| Control measures: Simple reaction time, articulation time, touch reaction                                                                                                                                                                                                                                                                                                                                                                                                                                                                                                                      | Cognitive Workshop                                        |
| <u>Interview of the child</u><br>1) Achievement strategies (17 items)<br>2) General attributions (4 items: success/failure)<br>3) Task-specific attributions x 2 (effort, skill, difficulty level)                                                                                                                                                                                                                                                                                                                                                                                             | Interview by the tester                                   |
| <u>Ratings</u><br>1) Child=s strategies (e.g., task avoidance, persistence)<br>2) Task attention                                                                                                                                                                                                                                                                                                                                                                                                                                                                                               | Ratings by the tester                                     |
| <u>Parent questionnaire</u><br>1) Spelling skills<br>2) Reading skills<br>3) Timing of reading acquisition<br>4) Attributions of success/failure, beliefs about child=s achievement, child=s strategies in achievement situations                                                                                                                                                                                                                                                                                                                                                              | Parental report                                           |

| GRADE 1: December, Group assessments at school                                                                                                                                                                                                                                                                                                        | Data                                     |
|-------------------------------------------------------------------------------------------------------------------------------------------------------------------------------------------------------------------------------------------------------------------------------------------------------------------------------------------------------|------------------------------------------|
| <b>Spelling</b><br>1) Syllables (9; <i>eh, vis, li</i> )<br>2) Bi-syllabic nonwords (9; <i>värö, ame, hopa</i> )<br>3) Complex nonwords (9; <i>hoipi, onkula, uivot</i> )<br>4) Error searching: AVerkku's Spelling Errors@ (6 min; <i>sadi, maato, sikä</i> )                                                                                        | Test                                     |
| <b>Reading</b><br>1) Word recognition (ALLU, TL2; matching word to pictures)                                                                                                                                                                                                                                                                          | Test<br>Test                             |
| <b>Teacher ratings</b><br>1) Reading (1 - 5; 1 = severe difficulties; 5 = very good skills )<br>2) Spelling (1 - 5; 1 = severe difficulties; 5 = very good skills )                                                                                                                                                                                   | Ratings by the teacher                   |
| <b>Teacher reports</b><br>1) Letters taught in the classroom by December<br>2) Type of reading difficulties<br>3) Type of spelling difficulties<br>4) More detailed description of reading problems (onset, remediation)<br>5) Description of other learning difficulties<br>6) Timing of reading acquisition (grasping of the principle of assembly) | Reports by the classroom teacher         |
| <b>Special education teacher reports</b><br>3) Classroom: Number of pupils in remediation & their problems<br>4) Types of reading & spelling difficulties<br>5) JLD child: Types of other learning difficulties & remediation                                                                                                                         | Reports by the special education teacher |
| <b>Parent questionnaire</b><br>1) Spelling skills<br>2) Reading skills (+ in Dec reading other materials than home work)<br>3) Timing of reading acquisition<br>4) Attributions of success/failure, beliefs about child=s achievement, child=s strategies in achievement situations                                                                   | Parental report                          |
| GRADE 1: January-March, Individual assessments                                                                                                                                                                                                                                                                                                        | Data                                     |
| <b>NEPSY – Neuropsychological Assessment (8 subtests)</b><br><i>Attention/Executive:</i> Tower, Knock and tap, Visual attention. <i>Language:</i> Comprehension of instructions, Oromotor sequences. <i>Sensorimotor:</i> Fingertip tapping, <i>Memory:</i> Memory for names (immediate & delayed), Sentence repetition                               | Test                                     |
| <b>VMI (Developmental Test of Visual-motor Integration; 24 items)</b>                                                                                                                                                                                                                                                                                 | Test                                     |
| <b>Morphology Test (30 items)</b>                                                                                                                                                                                                                                                                                                                     | Test                                     |
| <b>Rapid naming (RAN): Objects, letters, numbers, object names</b>                                                                                                                                                                                                                                                                                    | Test                                     |
| <b>Phonological awareness</b><br>1) Initial phoneme production & deletion ( <i>asuu</i> → <i>suu</i> )<br>2) Non-word repetition (18 items; <i>sipa, kutta, tiippa, tati, kuuki ...</i> )                                                                                                                                                             | Test<br>Cognitive Workshop               |
| <b>Reading</b><br>1) Letter naming (29 letters)<br>2) Syllables (9; <i>is, vor, ke</i> )<br>3) Bi-syllabic nonwords (9; <i>ysö, vami, evot</i> )<br>4) Complex nonwords (9; <i>päyhä, onsurä, eivot</i> )                                                                                                                                             | Test                                     |
| <b>Auditory modulation detection, “Parrot” (by John Stein)</b>                                                                                                                                                                                                                                                                                        | Computer test                            |



| GRADE 1: April, Group assessments at school                                                                                                                                                                                                                                                                                                                                                                                                                                                                                                                                                                                                                                                                                                                                                                                                                                                                                                                                                                                                                                                                                                                                                                                                                                                                                                                                                                                                                                                                                                                            | Data                                                                                                                                                                                                      |
|------------------------------------------------------------------------------------------------------------------------------------------------------------------------------------------------------------------------------------------------------------------------------------------------------------------------------------------------------------------------------------------------------------------------------------------------------------------------------------------------------------------------------------------------------------------------------------------------------------------------------------------------------------------------------------------------------------------------------------------------------------------------------------------------------------------------------------------------------------------------------------------------------------------------------------------------------------------------------------------------------------------------------------------------------------------------------------------------------------------------------------------------------------------------------------------------------------------------------------------------------------------------------------------------------------------------------------------------------------------------------------------------------------------------------------------------------------------------------------------------------------------------------------------------------------------------|-----------------------------------------------------------------------------------------------------------------------------------------------------------------------------------------------------------|
| <p><b>Spelling</b></p> <ol style="list-style-type: none"> <li>1) Syllables (9; <i>eh, vis, li</i>)</li> <li>2) Bi-syllabic nonwords (9; <i>värö, ame, hopa</i>)</li> <li>3) Complex nonwords (9; <i>hoipa, oipus, ankula</i>)</li> <li>4) Error searching: A Vekku's Spelling errors; 6 min; <i>jona, kaala, uido ...</i>)</li> </ol> <p><b>Reading</b></p> <ol style="list-style-type: none"> <li>1) Word recognition (ALLU, TL2B; 5 min; matching word to pictures)</li> <li>2) Reading comprehension: "Vekku's Stories" (4 sentences/picture, "find the word in one of the sentences which does not match the picture")</li> </ol> <p><b>Teacher ratings</b></p> <ol style="list-style-type: none"> <li>1) Reading (1 - 5; 1 = severe difficulties; 5 = very good skills )</li> <li>2) Spelling (1 - 5; 1 = severe difficulties; 5 = very good skills )</li> </ol> <p><b>Teacher reports</b></p> <ol style="list-style-type: none"> <li>1) Type of reading difficulties</li> <li>2) Type of spelling difficulties</li> <li>3) More detailed description of reading problems (onset, remediation)</li> <li>4) Description of other learning difficulties</li> <li>5) Timing of reading acquisition (grasping of the principle of assembly)</li> <li>6) Motivation</li> </ol> <p><b>Special education teacher reports</b></p> <ol style="list-style-type: none"> <li>1) Classroom: Number of pupils in remediation &amp; their problems</li> <li>2) JLD child: Reading &amp; spelling difficulties, types of other learning difficulties &amp; remediation</li> </ol> | <p>Test</p> <p>Test</p> <p>Test</p><br><p>Test</p> <p>Test</p> <p>Test</p><br><p>Ratings by the teacher</p><br><p>Reports by the classroom teacher</p><br><p>Reports by the special education teacher</p> |
| GRADE 1: May, Individual assessment                                                                                                                                                                                                                                                                                                                                                                                                                                                                                                                                                                                                                                                                                                                                                                                                                                                                                                                                                                                                                                                                                                                                                                                                                                                                                                                                                                                                                                                                                                                                    | Data                                                                                                                                                                                                      |
| <p><b>Phonological awareness</b></p> <ol style="list-style-type: none"> <li>1) Phoneme blending (Poskiparta ym.; 10 items; <i>p-u-u</i>)</li> <li>2) Syllable deletion (Poskiparta ym.; 10 items; <i>paluu</i> ∃ <i>luu</i>)</li> <li>3) Initial phoneme production &amp; deletion (Poskiparta ym.; 10 items; <i>asuu</i> ∃ <i>suu</i>)</li> <li>4) Phonological Common Unit Task: Syllable &amp; phoneme level (<i>lehmä</i> – <i>lehti</i>; <i>noita</i> – <i>kukka</i>)</li> </ol> <p><b>Phonological processing</b></p> <ol style="list-style-type: none"> <li>1) Perception, "Space alien" –task (22 items; "same or different")</li> <li>2) Production (19 items; <i>kanspultine, lipikuta, meppotto, naukutakoo</i>)</li> <li>3) Spelling (3 words; <i>äiti, koulu, isä</i>; 17 nonwords; <i>simpuu, rameli, trooki</i>)</li> </ol> <p><b>Reading</b></p> <ol style="list-style-type: none"> <li>1) Letter naming (29 letters)</li> <li>2) Content words (9 words; <i>koti, juosta, kolme, kirja</i>)</li> <li>3) Function words (9 words; <i>siellä, se, vain, mikä</i>)</li> <li>4) Syllables (9; <i>eh, vis, li, nä, kup</i>)</li> <li>5) Bi-syllabic nonwords (9; <i>värö, ame, hopa, ypöt</i>)</li> <li>6) Complex nonwords (9; <i>uivot, reistoa, sohdi, hoipi</i>)</li> <li>7) Oral text reading, "Exiting adventures", minimum duration 3 minutes: a) fluency (words/minute) &amp; accuracy (b) comprehension (3 questions)</li> </ol>                                                                                                                  | <p>Test</p> <p>Test</p> <p>Test</p> <p>CW</p><br><p>CW</p> <p>CW</p> <p>Scriptlog</p><br><p>Cognitive Workshop</p><br><p>Test audiotaping</p>                                                             |

| GRADE 1: May, Individual assessment (continued)                                                                                                                                                                                                                                                                                                                                                                                                                                                                                                                                                                                                                                                                                                                                                                                                                                                                                                                                                                                                                                                                                                                                                                                                                                                                                                                                                                                                                                                                                                                                                                                                                                                                                                                                                                                                                                                                                                                                                                                                                                                                                                                                                                                           | Data                                                                                                                                                                                                                                                    |
|-------------------------------------------------------------------------------------------------------------------------------------------------------------------------------------------------------------------------------------------------------------------------------------------------------------------------------------------------------------------------------------------------------------------------------------------------------------------------------------------------------------------------------------------------------------------------------------------------------------------------------------------------------------------------------------------------------------------------------------------------------------------------------------------------------------------------------------------------------------------------------------------------------------------------------------------------------------------------------------------------------------------------------------------------------------------------------------------------------------------------------------------------------------------------------------------------------------------------------------------------------------------------------------------------------------------------------------------------------------------------------------------------------------------------------------------------------------------------------------------------------------------------------------------------------------------------------------------------------------------------------------------------------------------------------------------------------------------------------------------------------------------------------------------------------------------------------------------------------------------------------------------------------------------------------------------------------------------------------------------------------------------------------------------------------------------------------------------------------------------------------------------------------------------------------------------------------------------------------------------|---------------------------------------------------------------------------------------------------------------------------------------------------------------------------------------------------------------------------------------------------------|
| <p><b><u>Spelling</u></b></p> <ol style="list-style-type: none"> <li>1) Letters (29 letters)</li> <li>2) Syllables (9 items; <i>is, vor, ke, tyn, ju</i>)</li> <li>3) Bi-syllabic nonwords (9 items; <i>ysö, vami, evot</i>)</li> <li>4) Complex nonwords (9 items; <i>hoipi, onkula, uivot, äystä</i>)</li> </ol> <p><b><u>Mathematics</u></b></p> <ol style="list-style-type: none"> <li>1) Numbers: (6 tasks)</li> <li>2) Comparison of auditorily presented numbers (12; “Which number is bigger”)</li> <li>3) Identification of aud. presented numbers (12; “Circle the number that you heard”)</li> <li>4) Counting (6 items; Adots@)</li> <li>5) Arithmetics (12 items; <math>4 + 5</math>, <math>8 - 3</math>, <math>527 + 31</math>, <math>485 - 42</math>)</li> </ol> <p><b><u>Control measures:</u></b> 1) Simple reaction time (<math>V \rightarrow</math> “nyt”), 2) Articulation time (“pupu”)</p> <p><b><u>Interview of the child</u></b> (April or May)</p> <ol style="list-style-type: none"> <li>1) Achievement strategies (20 items; e.g., <i>I delay beginning tasks, I try hard to solve even the more difficult tasks</i>)</li> <li>2) General attributions (4 items: success/failure; knows/does not know)</li> <li>3) Task-specific attributions x 2 (2 items: effort, skill, difficulty level)</li> <li>4) Motivation in school subjects (8 items, scale 1 - 5; <i>reading, spelling, maths, crafts, physical education, arts, music, reading at home</i>)</li> </ol> <p><b><u>Ratings</u></b></p> <ol style="list-style-type: none"> <li>1) Child=s strategies: active task orientation, active task avoidance, passivity, dependence on the adult, anxiety (10 items, scale 1 – 7; <i>When running into difficulty the child turns to the tester</i>)</li> <li>2) Attention, hyperactivity, impulsiveness (19 items, scale 1 – 7)</li> </ol> <p><b><u>Parent questionnaires</u></b></p> <ol style="list-style-type: none"> <li>1) Spelling</li> <li>2) Reading</li> <li>3) Timing of reading acquisition</li> <li>4) Child’s interest in reading</li> <li>5) Home work</li> <li>6) Attributions of success/failure, beliefs about child=s achievement, child=s strategies in achievement situations</li> </ol> | <p>Test</p> <p>Test</p> <p>Test</p> <p>Test</p><br><p>Test</p> <p>Test</p> <p>Test</p> <p>Test</p> <p>Test</p><br><p>Cognitive Workshop</p><br><p>Child=s interview by the tester</p><br><br><p>Ratings by the tester</p><br><br><p>Parental report</p> |
| 8-year questionnaires                                                                                                                                                                                                                                                                                                                                                                                                                                                                                                                                                                                                                                                                                                                                                                                                                                                                                                                                                                                                                                                                                                                                                                                                                                                                                                                                                                                                                                                                                                                                                                                                                                                                                                                                                                                                                                                                                                                                                                                                                                                                                                                                                                                                                     |                                                                                                                                                                                                                                                         |
| <p><b><u>Parent questionnaires</u></b></p> <ol style="list-style-type: none"> <li>1) Reading, joint activities with the child, hobbies, use of the computer</li> <li>3) Behavior Assessment System for Children (BASC)</li> <li>2) Parenting attitudes</li> <li>3) Parental achievement strategies &amp; self-esteem</li> <li>4) Family status &amp; employment,</li> <li>5) Stress, social support, work satisfaction</li> </ol>                                                                                                                                                                                                                                                                                                                                                                                                                                                                                                                                                                                                                                                                                                                                                                                                                                                                                                                                                                                                                                                                                                                                                                                                                                                                                                                                                                                                                                                                                                                                                                                                                                                                                                                                                                                                         | <p>Parental report</p>                                                                                                                                                                                                                                  |

| GRADE 2: November, Group assessments at school |                                                                                                                                                  | Data                                     |
|------------------------------------------------|--------------------------------------------------------------------------------------------------------------------------------------------------|------------------------------------------|
| <b>Spelling</b>                                |                                                                                                                                                  | Test                                     |
| 1)                                             | Nonwords 1 (9 items; <i>hoipa, oipus, ankula</i> )                                                                                               |                                          |
| 2)                                             | Nonwords 2 (9 items ; <i>lirestemmä, märskynäivä, syönikeitväs</i> )                                                                             |                                          |
| 3)                                             | Error searching; “Vekku’s Spelling Errors” (2 min; <i>suusi, tyttö, orave</i> )                                                                  |                                          |
| <b>Reading</b>                                 |                                                                                                                                                  | Test                                     |
| 1)                                             | Word recognition: ALLU, TL2 (2 min; matching word to picture)                                                                                    |                                          |
| 2)                                             | Sentence recognition: ALLU, TL4 (2 min; matching sentence to picture)                                                                            |                                          |
| 3)                                             | Judgment of claims: ALLU, TL3 (5 min; <i>People eat books</i> - true/false                                                                       |                                          |
| 4)                                             | Segmentation of sentences into words: Word Chains Test (1 min 25 sec)                                                                            |                                          |
| 5)                                             | Judgment of words: Word Chains Test (50 sec; <i>meri, seri</i> - word/nonword)                                                                   |                                          |
| 6)                                             | Segmentation of words into syllables: Word Chains Test (1 min 15 sec)                                                                            |                                          |
| 7)                                             | Reading comprehension: Vekku’s Stories (12 items, 4 sentences/picture; “find the word in one of the sentences which does not match the picture”) |                                          |
| 8)                                             | Reading comprehension: ALLU, LY2 “Judo”(45 min; Child responds to 12 multiple choice questions after reading the text)                           |                                          |
| <b>Mathematics (from NMART, Räsänen, 2000)</b> |                                                                                                                                                  | Test                                     |
| 1)                                             | Arithmetic reasoning: “Number boxes” (10 min; “fill in the the missing number in the number series”)                                             |                                          |
| 2)                                             | Visual search of target numbers: a) number 5, b) numbers between 45 and 55 (“underline the targets as fast as you can”)                          |                                          |
| <b>Teacher ratings</b>                         |                                                                                                                                                  | Ratings by the teacher                   |
| 1)                                             | Reading (scale 1 - 5; 1 = severe difficulties; 5 = very good skills )                                                                            |                                          |
| 2)                                             | Spelling (scale 1 - 5; 1 = severe difficulties; 5 = very good skills )                                                                           |                                          |
| <b>Teacher reports</b>                         |                                                                                                                                                  | Reports by the classroom teacher         |
| 3)                                             | Type of reading difficulties                                                                                                                     |                                          |
| 4)                                             | Type of spelling difficulties                                                                                                                    |                                          |
| 5)                                             | More detailed description of reading problems (onset, remediation)                                                                               |                                          |
| 6)                                             | Description of other learning difficulties                                                                                                       |                                          |
| <b>Special education teacher reports</b>       |                                                                                                                                                  | Reports by the special education teacher |
| 1)                                             | Classroom: Number of pupils in remediation & their problems                                                                                      |                                          |
| 2)                                             | Types of reading & spelling difficulties                                                                                                         |                                          |
| 3)                                             | JLD child: Types of other learning difficulties & remediation                                                                                    |                                          |
| <b>Parent questionnaire</b>                    |                                                                                                                                                  | Parental report                          |
| 1)                                             | Spelling                                                                                                                                         |                                          |
| 2)                                             | Reading                                                                                                                                          |                                          |
| 3)                                             | Timing of reading acquisition                                                                                                                    |                                          |
| 4)                                             | Attributions of success/failure, beliefs about child=s achievement, child=s strategies in achievement situations                                 |                                          |

| GRADE 2: October/November, Individual assessments                                                                                                                                                                                                                                                                                                                                                                                                                                                                                                                                                                                                                                                                                                                                                                                                                                                                                                                                                                                                                                                                                                                                                                                                                    |                       | Data                                                              |                       |               |                 |                  |                    |                 |           |               |  |      |
|----------------------------------------------------------------------------------------------------------------------------------------------------------------------------------------------------------------------------------------------------------------------------------------------------------------------------------------------------------------------------------------------------------------------------------------------------------------------------------------------------------------------------------------------------------------------------------------------------------------------------------------------------------------------------------------------------------------------------------------------------------------------------------------------------------------------------------------------------------------------------------------------------------------------------------------------------------------------------------------------------------------------------------------------------------------------------------------------------------------------------------------------------------------------------------------------------------------------------------------------------------------------|-----------------------|-------------------------------------------------------------------|-----------------------|---------------|-----------------|------------------|--------------------|-----------------|-----------|---------------|--|------|
| <p>WISC III; Wechsler Intelligence Scale for Children (<i>Wechsler, 1991</i>) – short form (5 verbal + 4 performance scale subtests)</p> <table><tr><td>1) Vocabulary</td><td>6) Picture Completion</td></tr><tr><td>2) Arithmetic</td><td>7) Block Design</td></tr><tr><td>3) Comprehension</td><td>8) Object Assembly</td></tr><tr><td>4) Similarities</td><td>9) Coding</td></tr><tr><td>5) Digit Span</td><td></td></tr></table>                                                                                                                                                                                                                                                                                                                                                                                                                                                                                                                                                                                                                                                                                                                                                                                                                                 |                       | 1) Vocabulary                                                     | 6) Picture Completion | 2) Arithmetic | 7) Block Design | 3) Comprehension | 8) Object Assembly | 4) Similarities | 9) Coding | 5) Digit Span |  | Test |
| 1) Vocabulary                                                                                                                                                                                                                                                                                                                                                                                                                                                                                                                                                                                                                                                                                                                                                                                                                                                                                                                                                                                                                                                                                                                                                                                                                                                        | 6) Picture Completion |                                                                   |                       |               |                 |                  |                    |                 |           |               |  |      |
| 2) Arithmetic                                                                                                                                                                                                                                                                                                                                                                                                                                                                                                                                                                                                                                                                                                                                                                                                                                                                                                                                                                                                                                                                                                                                                                                                                                                        | 7) Block Design       |                                                                   |                       |               |                 |                  |                    |                 |           |               |  |      |
| 3) Comprehension                                                                                                                                                                                                                                                                                                                                                                                                                                                                                                                                                                                                                                                                                                                                                                                                                                                                                                                                                                                                                                                                                                                                                                                                                                                     | 8) Object Assembly    |                                                                   |                       |               |                 |                  |                    |                 |           |               |  |      |
| 4) Similarities                                                                                                                                                                                                                                                                                                                                                                                                                                                                                                                                                                                                                                                                                                                                                                                                                                                                                                                                                                                                                                                                                                                                                                                                                                                      | 9) Coding             |                                                                   |                       |               |                 |                  |                    |                 |           |               |  |      |
| 5) Digit Span                                                                                                                                                                                                                                                                                                                                                                                                                                                                                                                                                                                                                                                                                                                                                                                                                                                                                                                                                                                                                                                                                                                                                                                                                                                        |                       |                                                                   |                       |               |                 |                  |                    |                 |           |               |  |      |
| <p><u>Parent-child interaction</u></p> <p>1) Card arrangement task: Part 1, One-way communication, Part 2, Two-way communication (<i>Ditton, Green &amp; Singer, 1987; Rasku-Puttonen, Lyytinen, Poikkeus, Laakso &amp; Ahonen, 1994</i>): Coding: parental communication clarity, quality of instructions</p> <p>2) Word learning, 10 minutes: Mother is asked to help her child to learn pseudoword names for 5 pictured objects (auto = rytvänä, pallo = moini, omena = lumpi, talo = töiterö, pipo = purmu). Coding: parental teaching strategies, quality of interaction</p> <p><u>Motor skills: Balancing</u></p> <p>1) Static balance: The child stands still on a balance recording device for 30 second in 5 conditions (eyes open &amp; gaze fixed on a target or eyes closed, feet apart or feet together or one foot ahead of the other)</p> <p>2) Dynamic balance: The child stands on a balance recording device and with slight body movement makes the cursor move from one target to next on the monitor's screen</p>                                                                                                                                                                                                                               |                       | Videotape                                                         |                       |               |                 |                  |                    |                 |           |               |  |      |
| GRADE 2: April, Group assessments at school                                                                                                                                                                                                                                                                                                                                                                                                                                                                                                                                                                                                                                                                                                                                                                                                                                                                                                                                                                                                                                                                                                                                                                                                                          |                       | Data                                                              |                       |               |                 |                  |                    |                 |           |               |  |      |
| <p><u>Spelling</u></p> <p>1) Nonwords 1 (4; <i>moivura, sehdi, insot, rölskä</i>)</p> <p>2) Nonwords 2 (9; <i>syönitiippa, kähynäivä, rynistemmä, kenstileisas</i>)</p> <p>3) Error searching: “Vekku’s Spelling Errors” (2 min; <i>jona, kaala, uido</i>)</p> <p><u>Reading</u></p> <p>1) Word recognition (ALLU, TL2; matching word to picture)</p> <p>2) Segmentation of sentences into words: Word Chains Test</p> <p>3) Reading comprehension: Vekku’s Stories (<i>Ressu karkaa, Isä poistaa tahrn, Mustetarha tuolissa, Sulamaton lumiukko</i>; 12 pictures; 4 sentences/picture, 10 min; “find the word in one of the sentences which does not match the picture”)</p> <p>4) Reading comprehension: ALLU, LY2, “Morning exercises” (45 min; Child responds to multiple choice questions after reading the text)</p> <p>Arithmetic reasoning (from NMART, Räsänen, 2000, orig. Langdon &amp; Warrington): Child is asked to continue number series by circling one of the alternative numbers (e.g., “What comes next in the series 5 10 15 – number 1, 25, 20 or 18?”)</p> <p><u>Teacher ratings</u></p> <p>1) Reading (1 - 5; 1 = severe difficulties; 5 = very good skills )</p> <p>2) Spelling (1 - 5; 1 = severe difficulties; 5 = very good skills )</p> |                       | <p>Test</p> <p>Test</p> <p>Test</p> <p>Ratings by the teacher</p> |                       |               |                 |                  |                    |                 |           |               |  |      |
| 9-year questionnaires                                                                                                                                                                                                                                                                                                                                                                                                                                                                                                                                                                                                                                                                                                                                                                                                                                                                                                                                                                                                                                                                                                                                                                                                                                                |                       |                                                                   |                       |               |                 |                  |                    |                 |           |               |  |      |
| <p><u>Parent questionnaires</u></p> <p>1) Reading, joint activities with the child, hobbies, use of the computer</p> <p>2) <i>Behavior Assessment System for Children (BASC)</i></p> <p>3) Parenting attitudes</p> <p>4) Family status &amp; employment,</p> <p>5) Mood, stress, social support</p>                                                                                                                                                                                                                                                                                                                                                                                                                                                                                                                                                                                                                                                                                                                                                                                                                                                                                                                                                                  |                       | Parental report                                                   |                       |               |                 |                  |                    |                 |           |               |  |      |

| GRADE 2: June, Individual assessment                                                                                                                                                                                                               |                                                                                                                                                                                                                                  | Data                                  |
|----------------------------------------------------------------------------------------------------------------------------------------------------------------------------------------------------------------------------------------------------|----------------------------------------------------------------------------------------------------------------------------------------------------------------------------------------------------------------------------------|---------------------------------------|
| <b>Reading</b>                                                                                                                                                                                                                                     |                                                                                                                                                                                                                                  |                                       |
| 1)                                                                                                                                                                                                                                                 | 3-syllabic words (10 items; <i>sininen, kiivetä, marssija</i> )                                                                                                                                                                  | CW                                    |
| 2)                                                                                                                                                                                                                                                 | 3-syllabic nonwords (10 items; <i>viepere, lunkkape, larvaanto</i> )                                                                                                                                                             | CW                                    |
| 3)                                                                                                                                                                                                                                                 | 4-syllabic words (10 items; <i>koululainen, vaqtimaton, kissanpentu</i> )                                                                                                                                                        | CW                                    |
| 4)                                                                                                                                                                                                                                                 | 4-syllabic nonwords (10 items; <i>köylämönsi, hiemakkola, tullakangit</i> )                                                                                                                                                      | CW                                    |
| 5)                                                                                                                                                                                                                                                 | List reading of words: Lukilasse (Häyrinen, Serenius-Sirve & Korkman; 2 min, 90 words; <i>eli, soi, jäät, kangerrella, kansanedustaja, snorkkelisukeltaja</i> ). Accuracy & Speed.                                               | Test                                  |
| 6)                                                                                                                                                                                                                                                 | Oral text reading, “Exiting adventures”, minimum duration 3 minutes: a) fluency (words/minute) & accuracy ( <i>Antin isoisä oli merikapteeni</i> )                                                                               | Test<br>audiotaping                   |
| 7)                                                                                                                                                                                                                                                 | Oral nonword text reading, “Vinnittäjiä tenkoja”: a) fluency (words/minute) & accuracy. 4 sentences ( <i>Intän äsiäni ila remipentaani</i> ).                                                                                    | Test<br>audiotaping                   |
| <b>Spelling</b>                                                                                                                                                                                                                                    |                                                                                                                                                                                                                                  |                                       |
| 8)                                                                                                                                                                                                                                                 | 4-syllabic words (6 items; <i>vahingossa, leivänpaahdin, lahjakortti</i> )                                                                                                                                                       | Test                                  |
| 9)                                                                                                                                                                                                                                                 | 4-syllabic nonwords, 1 additional repetition by child’s request (6 items; <i>moinipuuli</i> )                                                                                                                                    | Test<br>Test                          |
| 10)                                                                                                                                                                                                                                                | 4-syllabic nonwords (6 items; <i>peunumiile, mainokkeri, kimpuraali</i> )                                                                                                                                                        |                                       |
| <b>Rapid naming</b>                                                                                                                                                                                                                                |                                                                                                                                                                                                                                  |                                       |
| 1)                                                                                                                                                                                                                                                 | Serial, RAN: Objects (10 x 5 items; <i>auto, talo, kala, kynä, pallo</i> )                                                                                                                                                       | Test                                  |
| 2)                                                                                                                                                                                                                                                 | Serial, RAS: Colors, numbers, letters (50 items)                                                                                                                                                                                 | Test                                  |
| 3)                                                                                                                                                                                                                                                 | Individually presented pictures of objects (3 x 5 items; <i>auto, talo, kala, kynä, pallo</i> )                                                                                                                                  | CW                                    |
| <b>Phonological processing:</b> Perception, “Space alien” –task (22 items; “same or different”)                                                                                                                                                    |                                                                                                                                                                                                                                  | CW                                    |
| <b>Auditive processing</b>                                                                                                                                                                                                                         |                                                                                                                                                                                                                                  |                                       |
| 1)                                                                                                                                                                                                                                                 | “Parrot Task” (John Stein, Oxford): a) FM, Frequency Modulation ( <i>which of the words was more wavy</i> ), b) AM, Amplitude Modulation ( <i>... more wobbly</i> )                                                              | Computer                              |
| 2)                                                                                                                                                                                                                                                 | Audilex (Kai Karma): visuo-auditive perception ( <i>press the bar when it is turn for the last note in the melody</i> )                                                                                                          | Computer                              |
| 3)                                                                                                                                                                                                                                                 | “Dino Tasks” (Usha Goswami, Jenny Thomson): a) P-Centre Task ( <i>show me which of the two dinos has a stronger rhythm in his sound</i> ), b) Rise Time Task ( <i>show me which dino sounds different from the other dinos</i> ) | Computer                              |
| <b>Mathematics</b>                                                                                                                                                                                                                                 |                                                                                                                                                                                                                                  |                                       |
| 1)                                                                                                                                                                                                                                                 | Numbers: (6 tasks)                                                                                                                                                                                                               | Test                                  |
| 2)                                                                                                                                                                                                                                                 | Arithmetics (5 min; $11 - 2$ , $22 + 13 - 8$ , $3 \cdot 7 + 12$ )                                                                                                                                                                | Test                                  |
| <b>Interview of the child</b> (April or May)                                                                                                                                                                                                       |                                                                                                                                                                                                                                  |                                       |
| 1)                                                                                                                                                                                                                                                 | Achievement strategies (20 items; e.g., <i>I delay beginning tasks, I try hard to solve even the more difficult tasks</i> )                                                                                                      | Child=s<br>interview by the<br>tester |
| 2)                                                                                                                                                                                                                                                 | General attributions (4 items: success/failure; knows/does not know)                                                                                                                                                             |                                       |
| 3)                                                                                                                                                                                                                                                 | Task-specific attributions x 2 (2 items: effort, skill, difficulty level)                                                                                                                                                        |                                       |
| 4)                                                                                                                                                                                                                                                 | Motivation in school subjects (10 items, scale 1 - 5; <i>reading, spelling, maths, crafts, physical education, arts, music, religion, biology, reading at home</i> )                                                             |                                       |
| <b>Ratings</b>                                                                                                                                                                                                                                     |                                                                                                                                                                                                                                  |                                       |
| 1)                                                                                                                                                                                                                                                 | Child=s strategies: active task orientation, active task avoidance, passivity, dependence on the adult, anxiety (10 items, scale 1 – 7; <i>When running into difficulty the child turns to the tester</i> )                      | Ratings by the<br>tester              |
| 2)                                                                                                                                                                                                                                                 | Attention, hyperactivity, impulsiveness (19 items, scale 1 – 7)                                                                                                                                                                  |                                       |
| <b>Parent questionnaires</b>                                                                                                                                                                                                                       |                                                                                                                                                                                                                                  |                                       |
| <ul style="list-style-type: none"> <li>Spelling &amp; Reading, Child’s interest in reading</li> <li>Home work</li> <li>Attributions of success/failure, beliefs about child=s achievement, child=s strategies in achievement situations</li> </ul> |                                                                                                                                                                                                                                  | Parental report                       |

| GRADE 3: March, Group assessments at school                                                                                                                                                                                                    |  | Data                   |
|------------------------------------------------------------------------------------------------------------------------------------------------------------------------------------------------------------------------------------------------|--|------------------------|
| <b>Spelling</b>                                                                                                                                                                                                                                |  |                        |
| 1) Nonwords 1 (10; rinti, etti, ruumpii)                                                                                                                                                                                                       |  | Test                   |
| 2) Nonwords 2 (10; keinerä, dukkimaas, etakkajuut)                                                                                                                                                                                             |  |                        |
| 3) Writing a story from pictures: 5 different pictures                                                                                                                                                                                         |  |                        |
| <b>Reading</b>                                                                                                                                                                                                                                 |  |                        |
| 5) Word recognition (ALLU, TL2; matching word to picture)                                                                                                                                                                                      |  | Test                   |
| 6) Segmentation of sentences into words: (ALLU TL5)                                                                                                                                                                                            |  |                        |
| 7) Reading comprehension: ALLU, LY3, “Camera instructions” (45 min; Child responds to multiple choice questions after reading the text)                                                                                                        |  |                        |
| 8) Reading comprehension, mark the unfitting words, “The plants’ need of light”                                                                                                                                                                |  |                        |
| <b>Morphology</b>                                                                                                                                                                                                                              |  |                        |
| 1) Test of inflectional morphology (Written responses, inflection with non words)                                                                                                                                                              |  | Test                   |
| Arithmetic reasoning (from NMART, Räsänen, 2000, orig. Langdon & Warrington):<br>Child is asked to continue number series by circling one of the alternative numbers (e.g., “What comes next in the series 5 10 15 – number 1, 25, 20 or 18?”) |  | Test                   |
| <b>Teacher ratings</b>                                                                                                                                                                                                                         |  |                        |
| 3) Reading (1 – 5; 1 = severe difficulties; 5 = very good skills )                                                                                                                                                                             |  | Ratings by the teacher |
| 4) Spelling (1 – 5; 1 = severe difficulties; 5 = very good skills )                                                                                                                                                                            |  |                        |
| GRADE 3: April, Individual assessment                                                                                                                                                                                                          |  | Data                   |
| <b>Reading</b>                                                                                                                                                                                                                                 |  |                        |
| 1) 3-syllabic nonwords (10 items; <i>viepere, lunkkape, larvaanto</i> )                                                                                                                                                                        |  | CW                     |
| 2) 4-syllabic nonwords (10 items; <i>köylämönsi, hiemakkola, tullakangit</i> )                                                                                                                                                                 |  | CW                     |
| 3) Rapidly presented words with mask (18 items; <i>on, se, opettaja, kuningas</i> )                                                                                                                                                            |  | CW                     |
| 4) List reading of words: Lukilasse (Häyrinen, Serenius-Sirve & Korkman; 2 min, 105 words; <i>eli, soi, jäät, kangerrella, kansanedustaja, snorkkelisukeltaja</i> ).<br>Accuracy & Speed.                                                      |  | Test                   |
| 5) Oral text reading, “Nonsense things”, minimum duration 3 minutes: a) fluency (words/minute) & accuracy ( <i>Amerikassahan on kuulemma kaikkea</i> )                                                                                         |  | Test<br>audiotaping    |
| 6) Oral nonword text reading, “Vinnittäjiä tenkoja”: a) fluency (words/minute) & accuracy. 8 sentences ( <i>Intän äsiäni ila remipentaani</i> ).                                                                                               |  | Test<br>audiotaping    |
| <b>Spelling</b>                                                                                                                                                                                                                                |  |                        |
| 1) 4-syllabic words (10 items; professori, olympiastadion, trigonometria)                                                                                                                                                                      |  | Test                   |
| 2) 4-syllabic nonwords, (12 items; <i>moinipuuli, paunitteri, lantureeli</i> )                                                                                                                                                                 |  | Test                   |
| 3) 2-syllabic nonwords (12 items; <i>sinti, sintti, sintuu, sinttuu</i> )                                                                                                                                                                      |  | Scriptlog              |
| <b>Rapid naming</b>                                                                                                                                                                                                                            |  |                        |
| 1) Serial, RAN: Objects (10 x 5 items; <i>auto, talo, kala, kynä, pallo</i> )                                                                                                                                                                  |  | Test                   |
| 2) Serial, RAN: Letters (10 x 5 items; <i>O, A, S, T, P</i> )                                                                                                                                                                                  |  | Test                   |
| 3) Serial, RAN: Numbers (10 x 5 items; <i>2, 6, 9, 4, 7</i> )                                                                                                                                                                                  |  | Test                   |
| 4) Individually presented pictures of objects (3 x 5 items; <i>auto, talo, kala, kynä, pallo</i> )                                                                                                                                             |  | Test                   |
| <b>Phonological processing:</b>                                                                                                                                                                                                                |  |                        |
| 1) Perception, “Space alien” –task (22 items; “same or different”)                                                                                                                                                                             |  | CW                     |
| 2) Phonological Common Unit Task: Phoneme level ( <i>lauhkua-terike upittaa- homppe</i> )                                                                                                                                                      |  | CW                     |
| <b>Auditive processing</b>                                                                                                                                                                                                                     |  |                        |

|                                                                                                                                                                                                                                                                                                                                                           |                                 |
|-----------------------------------------------------------------------------------------------------------------------------------------------------------------------------------------------------------------------------------------------------------------------------------------------------------------------------------------------------------|---------------------------------|
| 1) “Parrot Task” (John Stein, Oxford): a) FM, Frequency Modulation ( <i>which of the words was more wavy</i> ), b) AM, Amplitude Modulation ( <i>... more wobbly</i> )                                                                                                                                                                                    | Computer                        |
| <b>Mathematics</b>                                                                                                                                                                                                                                                                                                                                        |                                 |
| 1) Numbers: (6 tasks)                                                                                                                                                                                                                                                                                                                                     | Test                            |
| 2) Arithmetics (5 min; $11 - 2$ , $22 + 13 - 8$ , $2 \cdot 8$ )                                                                                                                                                                                                                                                                                           | Test                            |
| <b>Memory</b>                                                                                                                                                                                                                                                                                                                                             | Test                            |
| 1) Digit Span                                                                                                                                                                                                                                                                                                                                             |                                 |
| <b>Interview of the child</b> (April or May)                                                                                                                                                                                                                                                                                                              |                                 |
| 1) Achievement strategies (20 items; e.g., <i>I delay beginning tasks, I try hard to solve even the more difficult tasks</i> )                                                                                                                                                                                                                            | Child=s interview by the tester |
| 2) General attributions (4 items: success/failure; knows/does not know)                                                                                                                                                                                                                                                                                   |                                 |
| 3) Task-specific attributions x 2 (2 items: effort, skill, difficulty level)                                                                                                                                                                                                                                                                              |                                 |
| 4) Motivation in school subjects (10 items, scale 1 - 5; <i>reading, spelling, maths, crafts, physical education, arts, music, religion, biology, reading at home</i> )                                                                                                                                                                                   |                                 |
| <b>Ratings</b>                                                                                                                                                                                                                                                                                                                                            | Ratings by the tester           |
| 1) Child=s strategies: active task orientation, active task avoidance, passivity, dependence on the adult, anxiety (10 items, scale 1 – 7; <i>When running into difficulty the child turns to the tester</i> )                                                                                                                                            |                                 |
| 2) Attention, hyperactivity, impulsiveness (19 items, scale 1 – 7)                                                                                                                                                                                                                                                                                        |                                 |
| <b>Parent questionnaires</b>                                                                                                                                                                                                                                                                                                                              | Parental report                 |
| <ul style="list-style-type: none"> <li>Spelling &amp; Reading, Child’s interest in reading</li> <li>Home work</li> <li>Attributions of success/failure, beliefs about child=s achievement, child=s strategies in achievement situations</li> </ul>                                                                                                        |                                 |
| <b>GRADE 5: April, Individual assessment</b>                                                                                                                                                                                                                                                                                                              |                                 |
| <b>Reading</b>                                                                                                                                                                                                                                                                                                                                            |                                 |
| 1) List reading of words: Lukilasse (Häyrinen, Serenius-Sirve & Korkman; 1 min, 105 words; <i>eli, soi, jäät, kangerrella, kansanedustaja, snorkkelisukeltaja</i> ). Accuracy & Speed.                                                                                                                                                                    | Test                            |
| <b>Spelling</b>                                                                                                                                                                                                                                                                                                                                           |                                 |
| 1) 2-syllabic nonwords (24 items; <i>siinttu, siinttuu, senkkuu, seenkkuu</i> )                                                                                                                                                                                                                                                                           | Scriptlog                       |
| <b>Self report</b>                                                                                                                                                                                                                                                                                                                                        | Self report                     |
| <ul style="list-style-type: none"> <li>Achievement strategies (20 items; e.g., <i>I delay beginning tasks, I try hard to solve even the more difficult tasks</i>)</li> <li>Motivation in school subjects (10 items, scale 1 - 5; <i>reading, spelling, maths, crafts, physical education, arts, music, religion, biology, reading at home</i>)</li> </ul> |                                 |
| <b>Parent questionnaires</b>                                                                                                                                                                                                                                                                                                                              | Parental report                 |
| <ul style="list-style-type: none"> <li>Spelling &amp; Reading, Child’s interest in reading, Time spent to homework</li> <li>Attributions of success/failure, beliefs about child=s achievement</li> <li>Child’s motor skills</li> </ul>                                                                                                                   |                                 |
| <b>Teacher questionnaire</b>                                                                                                                                                                                                                                                                                                                              | Teacher report                  |
| <ul style="list-style-type: none"> <li>Reading, spelling, math skills</li> <li>Motor skills</li> <li>Need of special support in learning</li> </ul>                                                                                                                                                                                                       |                                 |
| <b>GRADE 7: February-March, Group assessments at school</b>                                                                                                                                                                                                                                                                                               |                                 |
| <b>Reading</b>                                                                                                                                                                                                                                                                                                                                            |                                 |
| 1) Word segmentation, <i>1 min 30s</i> , Nevala                                                                                                                                                                                                                                                                                                           | Test                            |
| 2) Searching errors in spelled words, <i>3 min. 30s</i> Nevala                                                                                                                                                                                                                                                                                            | Test                            |
| 3) Reading comprehension: underline the inappropriate words in the text                                                                                                                                                                                                                                                                                   | Test                            |
| 4) Salzburg, reading fluency –test, <i>3 min</i>                                                                                                                                                                                                                                                                                                          |                                 |

---

## Mathematics

KTLT-A, arithmetic tasks which are presented in written form to the child. One third of the items is multiple choice task and rest are open ended. (Räsänen, P. & Leino, L., Niilo Mäki Instituutti (2005))

---

## Arithmetic reasoning

Test

Child's task is to reason out the missing number. Reasoning is based on the logic of other presented numbers in the 3\*3 matrix (from NMART, Räsänen, P., Niilo Mäki Instituutti)

---

## Self report

- Reading habits and use of computer

Self report

## Parent questionnaires

Concerning child:

Parental report

- Reading habits and use of computer
- Reading, spelling, math skills
- Homework
- Parenting
- Attributions of success/failure, beliefs about child's achievement
- Strengths and weaknesses

Concerning self:

- Family structure
- Education, employment
- Stress and mood

---

## **GRADE 8: September-November, Individual assessments at the university**

**Data**

### Reading

- 1) List reading: Words (Lukilasse), 1 min time limit, max 105 words
- 2) Text reading: "Tunturilappi" Part 1, aloud
- 3) Text reading: "Tunturilappi" Part 2 Silent reading, marking unfit words
- 4) Single word reading, Rapidly presented words (100 ms), 18 items
- 5) Non word text reading – "Vinnittäjiä tenkoja"

Test

CW

CW

CW

### Spelling

1. Words, 10 items
2. Non words with 3-4 syllables, 20 items
3. Non word text in sentences, 6 sentences
4. Non words with Scriptlog, 12 items

CW

CW

CW

Scriptlog

### Rapid Naming, RAN

1. Objects
2. Letters
3. RAS: Letters + numbers + colors

Test

Test

Test

### Auditory perception

1. Duration perception, 22 items
2. Eke-Ekke categorization, 80 items
3. Y – I – non speech, 80 items
4. Y – I – speech, 80 items

CW

CW

CW

CW

### Phonology

1. Phoneme deletion, 20 items
2. Common unit – Nonwords, 15 items

CW

CW

### Memomry

1. Digit Span Numbers Forwards and Backwards
2. Digit Span syllables Forwards and Backwards

Test

Test



|                                                                                                                                                                                                                                                                                                                                                                                                                                                                                                                                                                                                                                                                |                                                          |
|----------------------------------------------------------------------------------------------------------------------------------------------------------------------------------------------------------------------------------------------------------------------------------------------------------------------------------------------------------------------------------------------------------------------------------------------------------------------------------------------------------------------------------------------------------------------------------------------------------------------------------------------------------------|----------------------------------------------------------|
| <p><b><u>Self report</u></b><br/> <b>Strengths &amp; Difficulties Questionnaires, SDQ</b>, Goodman R (1997) The Strengths and Difficulties Questionnaire: A Research Note. <i>Journal of Child Psychology and Psychiatry</i>, 38, 581-586.</p> <p><b><u>Parent report</u></b><br/> <b>Strengths &amp; Difficulties Questionnaires, SDQ</b>, Goodman R (1997) The Strengths and Difficulties Questionnaire: A Research Note. <i>Journal of Child Psychology and Psychiatry</i>, 38, 581-586.</p>                                                                                                                                                                | <p><b>Self report</b></p> <p><b>Parent report</b></p>    |
| <p><b>GRADE 9: March-April, Group assessments at school</b></p>                                                                                                                                                                                                                                                                                                                                                                                                                                                                                                                                                                                                | <p><b>Data</b></p>                                       |
| <p><b><u>Reading</u></b></p> <ol style="list-style-type: none"> <li>1) Word segmentation, <i>1 min 30s</i>, Nevala</li> <li>2) Searching errors in spelled words, <i>3 min</i>. Nevala</li> <li>3) Reading comprehension: underline the inappropriate words in the text</li> <li>4) Salzburg, reading fluency –test, <i>2 min</i></li> </ol>                                                                                                                                                                                                                                                                                                                   | <p><b>Test</b></p> <p><b>Test</b></p> <p><b>Test</b></p> |
| <p><b><u>Mathematics</u></b><br/> <b>KTLT-A</b>, arithmetic tasks which are presented in written form to the child. One third of the items is multiple choice task and rest are open ended. (Räsänen, P. &amp; Leino, L., Niilo Mäki Instituutti (2005))</p>                                                                                                                                                                                                                                                                                                                                                                                                   | <p><b>Test</b></p>                                       |
| <p><b><u>Arithmetic reasoning</u></b><br/> Child's task is to reason out the missing number. Reasoning is based on the logic of other presented numbers in the 3*3 matrix (from NMART, Räsänen, P., Niilo Mäki Instituutti)</p>                                                                                                                                                                                                                                                                                                                                                                                                                                | <p><b>Test</b></p>                                       |
| <p><b><u>Self report</u></b></p> <ul style="list-style-type: none"> <li>• Reading habits and use of computer</li> </ul> <p><b><u>Parent questionnaires</u></b></p> <p><b>Concerning child:</b></p> <ul style="list-style-type: none"> <li>• Reading habits and use of computer</li> <li>• Reading, spelling, math skills</li> <li>• Homework</li> <li>• Parenting</li> <li>• Attributions of success/failure, beliefs about child=s achievement</li> <li>• Strengths and weaknesses</li> </ul> <p><b>Concerning self:</b></p> <ul style="list-style-type: none"> <li>• Family structure</li> <li>• Education, employment</li> <li>• Stress and mood</li> </ul> | <p><b>Self report</b></p> <p><b>Parental report</b></p>  |
