# Supplementary material for: Unveiling the Mysteries of Dyslexia—Lessons Learned from the Prospective Jyväskylä Longitudinal Study of Dyslexia
Source: MDPI journal article supplement (doi:10.3390/brainsci11040427), 2021-03-27
Supplement: s1 [file s1]

TABLE S2      Summary of the technical details in EEG measurements.

|                   | Newborns                | 6 months & 6.5 years    | Grade 3                 |
|-------------------|-------------------------|-------------------------|-------------------------|
| No. of electrodes | 6 Ag/AgCl               | 10 Ag/AgCl              | 128 Ag/AgCl             |
| Reference         | Ipsilateral mastoids    | Ipsilateral mastoids    | Cz                      |
| Sampling rate     | 200 Hz                  | 200 Hz                  | 500 Hz                  |
| Online filtering  | 0.5–35 Hz               | 0.5–35 Hz               | 0.1–100 Hz              |
| Offline filtering | -                       | -                       | 0.53–35 Hz, 50 Hz       |
| Artefact criteria | > $\pm 200 \mu\text{V}$ | > $\pm 200 \mu\text{V}$ | > $\pm 200 \mu\text{V}$ |

Note. Ag/AgCl, silver/silver chloride electrode.
